# Supplementary material for: Spinochrome Identification and Quantification in Pacific Sea Urchin Shells, Coelomic Fluid and Eggs Using HPLC-DAD-MS
Source: PubMed Central journal article supplement (PMC7825409; doi:10.3390/md19010021), 2021-01-06
Supplement: marinedrugs-19-00021-s001.pdf [file marinedrugs-19-00021-s001.pdf]

## **- Supporting Information -**

### **Spinochromes identification and quantification in Pacific sea urchins shells, coelomic fluid, and eggs using HPLC-DAD-MS**

**Elena A. Vasileva <sup>1,\*</sup>, Natalia P. Mishchenko <sup>1</sup>, Van T. T. Tran <sup>2</sup>, Hieu M. N. Vo <sup>2</sup>, and Sergey A. Fedoreyev <sup>1</sup>**

<sup>1</sup> Laboratory of the Chemistry of Natural Quinonoid Compounds, G.B. Elyakov Pacific Institute of Bioorganic Chemistry, Far Eastern Branch of Russian Academy of Sciences, 690022, Vladivostok, Russia; vasilieva\_el\_an@mail.ru (E.A.V.); mischenkonp@mail.ru (N.P.M.); fedoreev-s@mail.ru (S.A.F.)

<sup>2</sup> Nhatrang Institute of Technology Research and Application, VAST, Khanh Hoa, Vietnam; vanvvlnt@yahoo.com.vn (V.T.T.T.); nhuhieu@nitra.vast.vn (H.M.N.V.)

\* Correspondence: vasilieva\_el\_an@mail.ru; Tel.: +7-9025272055

## TABLE OF CONTENTS:

|                                                                                                                                                                                                                                                                                          |    |
|------------------------------------------------------------------------------------------------------------------------------------------------------------------------------------------------------------------------------------------------------------------------------------------|----|
| <b>Table S1.</b> Accuracy and reproducibility of the quantification of standard samples spinochrome E (1), spinochrome D (3), 7,7'-anhydroethylidene-6,6'-bis(2,3,7-trihydroxynaphthazarin) (11), and echinochrome A (16) using HPLC method. ....                                        | 3  |
| <b>Figure S1.</b> Typical HPLC profile of <i>Strongylocentrotus intermedius</i> total extract.....                                                                                                                                                                                       | 4  |
| <b>Figure S2.</b> Typical HPLC profile of <i>Toxopneustes pileous</i> total extract.....                                                                                                                                                                                                 | 4  |
| <b>Figure S3.</b> Typical HPLC profile of <i>Tripneustes gratilla</i> CHCl <sub>3</sub> extract .....                                                                                                                                                                                    | 5  |
| <b>Figure S4.</b> Typical HPLC profile of <i>Tripneustes gratilla</i> EtOAc extract .....                                                                                                                                                                                                | 5  |
| <b>Figure S5.</b> Typical HPLC profile of <i>Phyllacanthus imperialis</i> CHCl <sub>3</sub> extract.....                                                                                                                                                                                 | 6  |
| <b>Figure S6.</b> Typical HPLC profile of <i>Diadema savignyi</i> total extract.....                                                                                                                                                                                                     | 6  |
| <b>Figure S7.</b> Typical HPLC profile of <i>Diadema setosum</i> total extract.....                                                                                                                                                                                                      | 7  |
| <b>Figure S8.</b> Typical HPLC profile of <i>Echinothrix calamaris</i> total extract.....                                                                                                                                                                                                | 7  |
| <b>Figure S9.</b> Typical HPLC profile of <i>Echinothrix diadema</i> total extract.....                                                                                                                                                                                                  | 8  |
| <b>Figure S10.</b> Typical HPLC profile of <i>Stomopneustes variolaris</i> total extract.....                                                                                                                                                                                            | 8  |
| <b>Figure S11.</b> Typical HPLC profile of <i>Echinarachnius parma</i> total extract.....                                                                                                                                                                                                | 9  |
| <b>Figure S12.</b> Typical HPLC profile of <i>L. decagonale</i> total extract .....                                                                                                                                                                                                      | 9  |
| <b>Figure S13.</b> Typical HPLC profile of <i>Scaphechinus mirabilis</i> CHCl <sub>3</sub> extract.....                                                                                                                                                                                  | 10 |
| <b>Figure S14.</b> Typical HPLC profile of <i>Scaphechinus mirabilis</i> EtOAc extract .....                                                                                                                                                                                             | 10 |
| <b>Figure S15.</b> Typical HPLC profile of <i>Scaphechinus griseus</i> CHCl <sub>3</sub> extract.....                                                                                                                                                                                    | 11 |
| <b>Figure S16.</b> Typical HPLC profile of <i>Scaphechinus griseus</i> EtOAc extract.....                                                                                                                                                                                                | 11 |
| <b>Figure S17.</b> Typical HPLC profile of <i>Echinocardium cordatum</i> total extract .....                                                                                                                                                                                             | 12 |
| <b>Table S2.</b> Quinonoid pigments with established structure, found in various sea urchin species. .                                                                                                                                                                                   | 13 |
| <b>Table S3.</b> Quinonoid pigments with established structure that have been found at least once in sea urchins, but their nativeness has not been proven. ....                                                                                                                         | 14 |
| <b>Table S4.</b> Quinonoid pigments found in sea urchins, that have no established structure. ....                                                                                                                                                                                       | 15 |
| <b>Table S5.</b> Compounds found in sea urchins without proof of their quinonoid nature. ....                                                                                                                                                                                            | 16 |
| <b>Figure S18.</b> Absorption spectra (ethanol): <b>A)</b> echinochrome A (16) and spinochrome E (1) in comparison with the spectrum of the <i>M. nudus</i> coelomic fluid (CF) extract; <b>B)</b> echinochrome A (16) in comparison with the spectrum of <i>S. intermedius</i> CF. .... | 17 |
| <b>Figure S19.</b> HPLC profile of <i>Scaphechinus mirabilis</i> 3-day and 21-day pluteus. ....                                                                                                                                                                                          | 17 |
| <b>Figure S20.</b> HPLC profile of <i>Echinarachnius parma</i> jelly-like egg membrane pigment granules ....                                                                                                                                                                             | 18 |
| <b>Total Quinonoid Pigments Content</b> .....                                                                                                                                                                                                                                            | 18 |
| <b>References</b> .....                                                                                                                                                                                                                                                                  | 19 |

**Table S1.** Accuracy and reproducibility of the quantification of standard samples spinochrome E (1), spinochrome D (3), 7,7'-anhydroethylidene-6,6'-bis(2,3,7-trihydroxynaphthazarin) (11), and echinochrome A (16) using HPLC method.

| <b>Spinochrome E (1)</b>                                                                | <b>Level 1<br/>(100 ng/ml)</b> | <b>Accuracy,<br/>%</b> | <b>Level 2<br/>(350 ng/ml)</b> | <b>Accuracy,<br/>%</b> | <b>Level 3 (700<br/>ng/ml)</b>  | <b>Accuracy,<br/>%</b> |
|-----------------------------------------------------------------------------------------|--------------------------------|------------------------|--------------------------------|------------------------|---------------------------------|------------------------|
| Sample 1                                                                                | 108                            | 108.0                  | 329                            | 94.0                   | 728                             | 104.0                  |
| Sample 2                                                                                | 93                             | 93.0                   | 346                            | 98.8                   | 716                             | 102.3                  |
| Sample 3                                                                                | 100                            | 100.0                  | 359                            | 102.6                  | 687                             | 98.1                   |
| Sample 4                                                                                | 98                             | 98.0                   | 351                            | 100.3                  | 703                             | 100.4                  |
| $\bar{X}^*$                                                                             | 99.8                           |                        | 346.3                          |                        | 708.5                           |                        |
| SD**                                                                                    | 6.2                            |                        | 12.7                           |                        | 17.6                            |                        |
| S <sub>r</sub> ***, %                                                                   | 6.2                            |                        | 3.7                            |                        | 2.5                             |                        |
| <b>Spinochrome D (3)</b>                                                                | <b>Level 1<br/>(200 ng/ml)</b> | <b>Accuracy,<br/>%</b> | <b>Level 2<br/>(400 ng/ml)</b> | <b>Accuracy,<br/>%</b> | <b>Level 3 (700<br/>ng/ml)</b>  | <b>Accuracy,<br/>%</b> |
| Sample 1                                                                                | 193                            | 96.5                   | 422                            | 105.5                  | 669                             | 95.6                   |
| Sample 2                                                                                | 201                            | 100.5                  | 403                            | 100.7                  | 723                             | 103.3                  |
| Sample 3                                                                                | 211                            | 105.5                  | 388                            | 97.0                   | 711                             | 101.6                  |
| Sample 4                                                                                | 198                            | 99.0                   | 392                            | 98.0                   | 681                             | 97.3                   |
| $\bar{X}^*$                                                                             | 200.7                          |                        | 401.2                          |                        | 696                             |                        |
| SD**                                                                                    | 7.6                            |                        | 15.2                           |                        | 25.2                            |                        |
| S <sub>r</sub> ***, %                                                                   | 3.8                            |                        | 3.8                            |                        | 3.6                             |                        |
| <b>7,7'-anhydroethylidene-<br/>6,6'-bis(2,3,7-<br/>trihydroxynaphthazarin)<br/>(11)</b> | <b>Level 1<br/>(250 ng/ml)</b> | <b>Accuracy,<br/>%</b> | <b>Level 2<br/>(700 ng/ml)</b> | <b>Accuracy,<br/>%</b> | <b>Level 3<br/>(1300 ng/ml)</b> | <b>Accuracy,<br/>%</b> |
| Sample 1                                                                                | 261                            | 104.4                  | 683                            | 97.6                   | 1403                            | 107.9                  |
| Sample 2                                                                                | 238                            | 95.2                   | 712                            | 101.7                  | 1362                            | 97.3                   |
| Sample 3                                                                                | 259                            | 103.6                  | 734                            | 104.8                  | 1278                            | 98.3                   |
| Sample 4                                                                                | 247                            | 98.8                   | 691                            | 98.7                   | 1316                            | 101.2                  |
| $\bar{X}^*$                                                                             | 251.2                          |                        | 705                            |                        | 1339.7                          |                        |
| SD**                                                                                    | 10.8                           |                        | 22.8                           |                        | 54.4                            |                        |
| S <sub>r</sub> ***, %                                                                   | 4.3                            |                        | 3.2                            |                        | 4.0                             |                        |
| <b>Echinochrome A (16)</b>                                                              | <b>Level 1<br/>(100 ng/ml)</b> | <b>Accuracy,<br/>%</b> | <b>Level 2<br/>(250 ng/ml)</b> | <b>Accuracy,<br/>%</b> | <b>Level 3 (500<br/>ng/ml)</b>  | <b>Accuracy,<br/>%</b> |
| Sample 1                                                                                | 105                            | 105.0                  | 238                            | 95.2                   | 512                             | 102.4                  |
| Sample 2                                                                                | 100                            | 100.0                  | 248                            | 99.2                   | 518                             | 103.6                  |
| Sample 3                                                                                | 98                             | 98.0                   | 253                            | 101.2                  | 503                             | 100.6                  |
| Sample 4                                                                                | 103                            | 103.0                  | 262                            | 104.8                  | 509                             | 101.8                  |
| $\bar{X}^*$                                                                             | 101.5                          |                        | 250.3                          |                        | 510.5                           |                        |
| SD**                                                                                    | 3.1                            |                        | 10.2                           |                        | 6.2                             |                        |
| S <sub>r</sub> ***, %                                                                   | 3.06                           |                        | 4.0                            |                        | 1.2                             |                        |

\* $\bar{X}$  – mean; \*\*SD – standard deviation; \*\*\*S<sub>r</sub> – relative standard deviation, %

All the unmarked peaks throughout the file do not have characteristic quinonoid absorption spectrum.

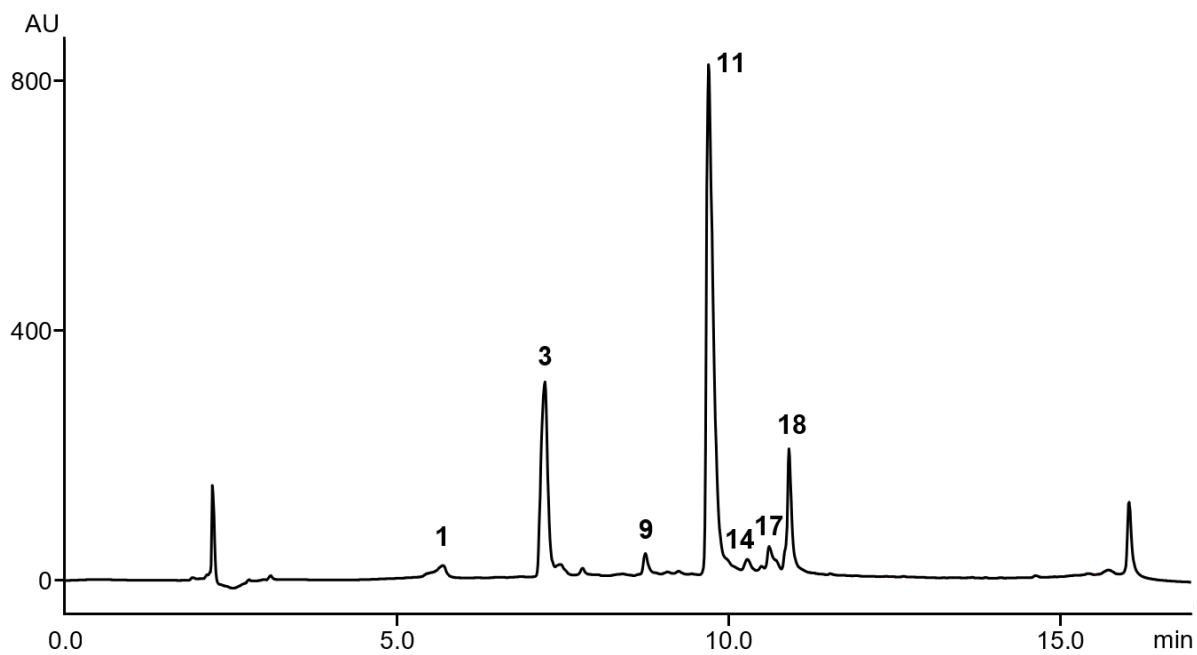

**Figure S1.** Typical HPLC profile of *Strongylocentrotus intermedius* total extract

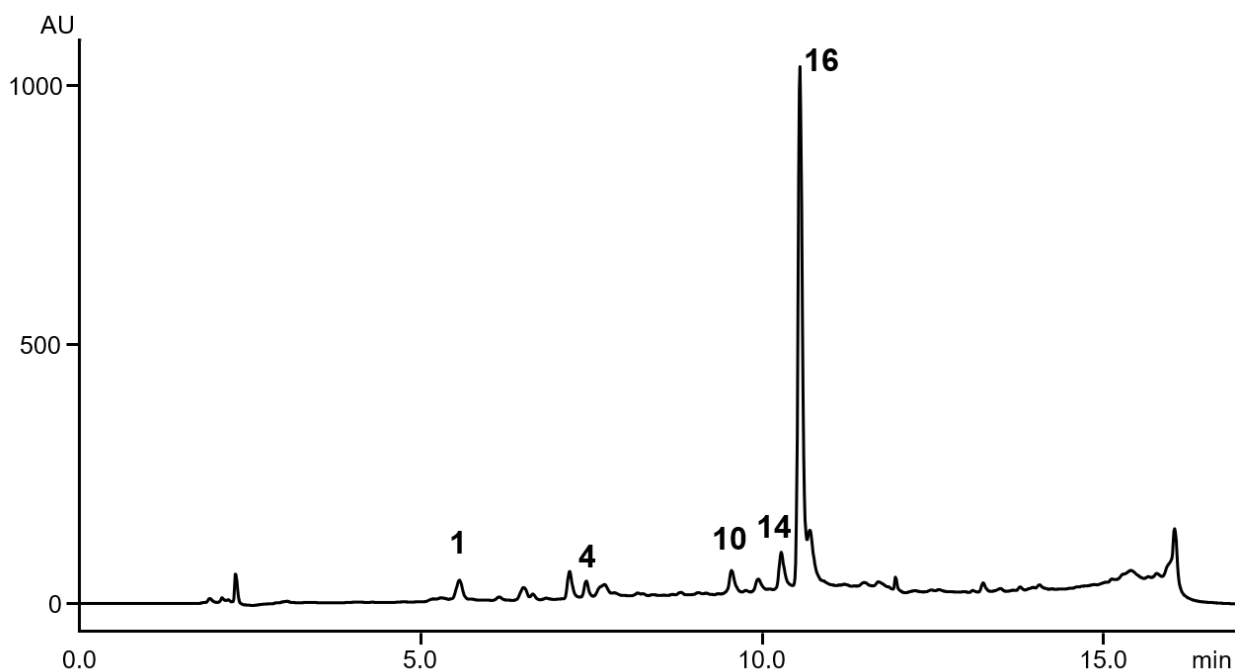

**Figure S2.** Typical HPLC profile of *Toxopneustes pileous* total extract

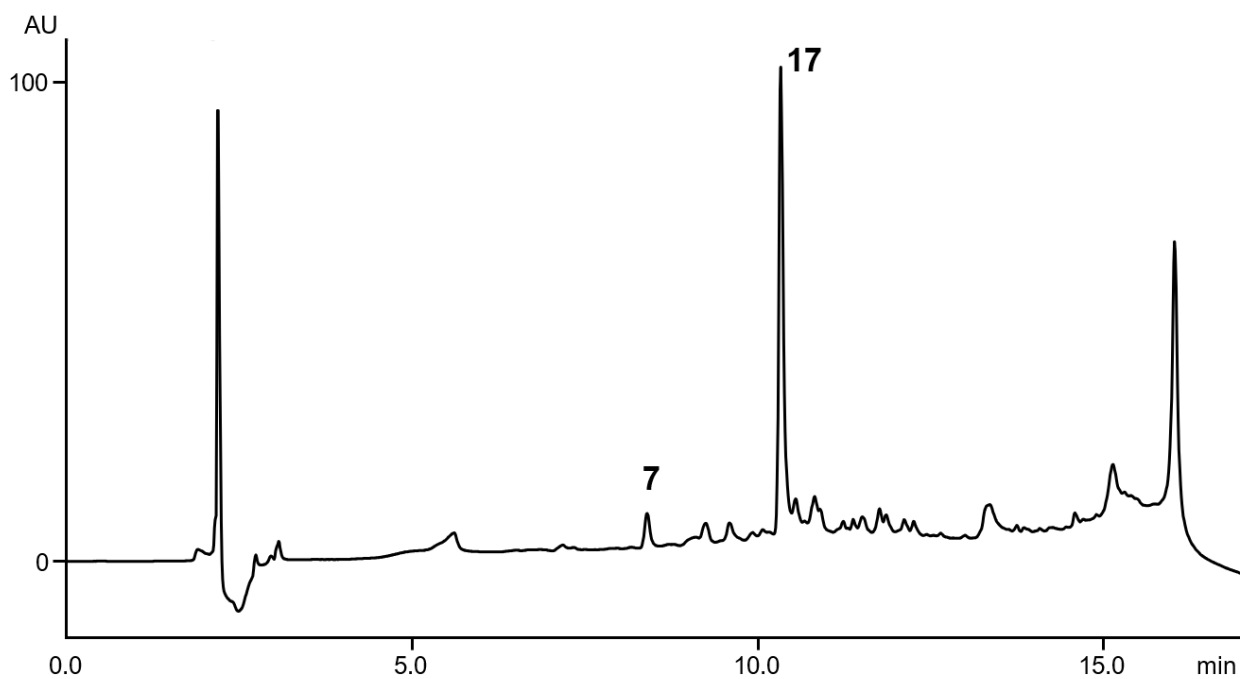

**Figure S3.** Typical HPLC profile of *Tripneustes gratilla* CHCl<sub>3</sub> extract

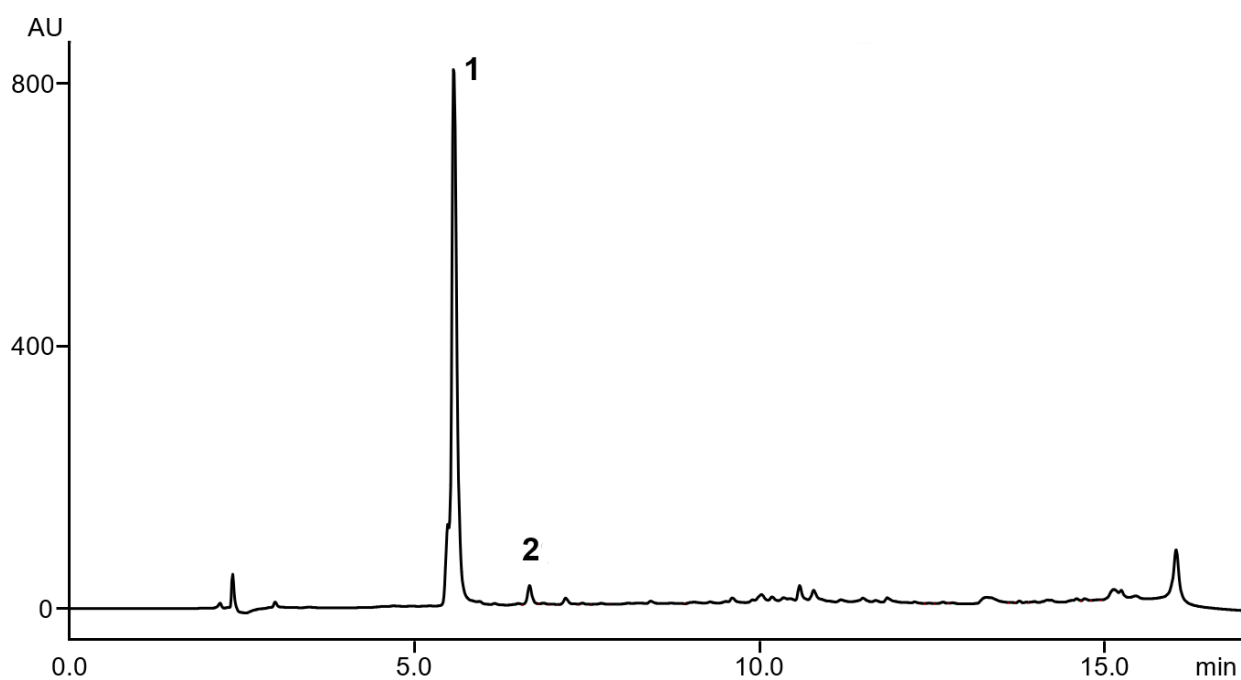

**Figure S4.** Typical HPLC profile of *Tripneustes gratilla* EtOAc extract

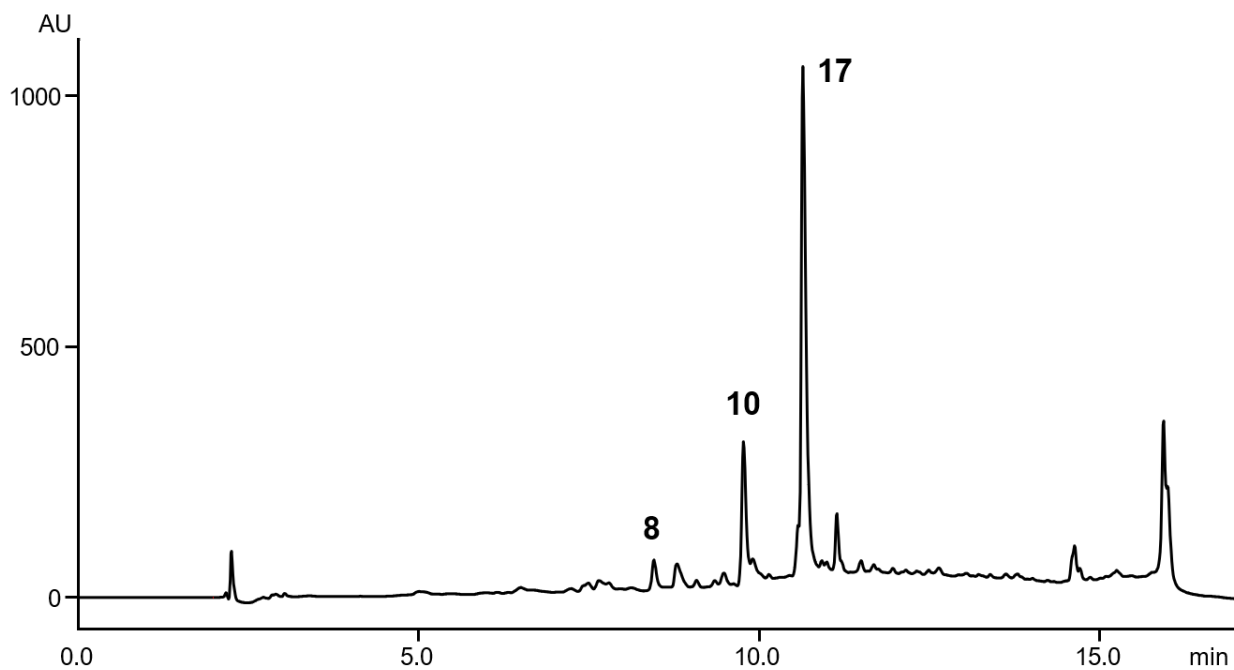

**Figure S5.** Typical HPLC profile of *Phyllacanthus imperialis* CHCl<sub>3</sub> extract

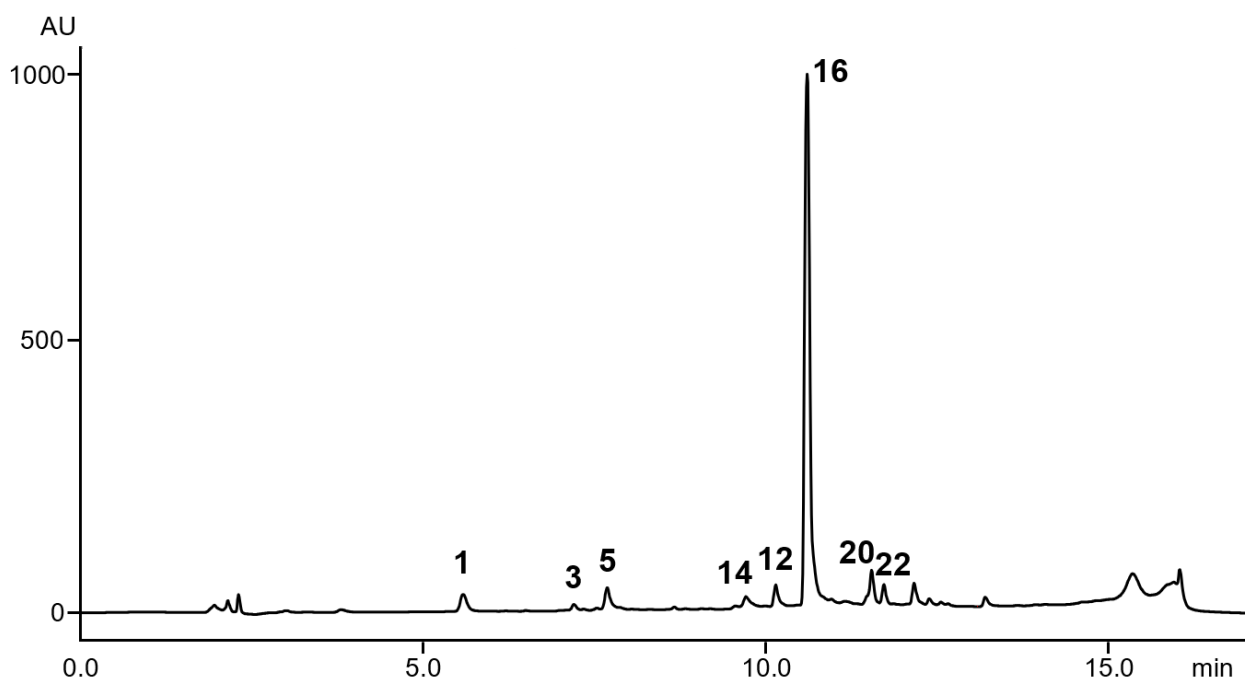

**Figure S6.** Typical HPLC profile of *Diadema savignyi* total extract

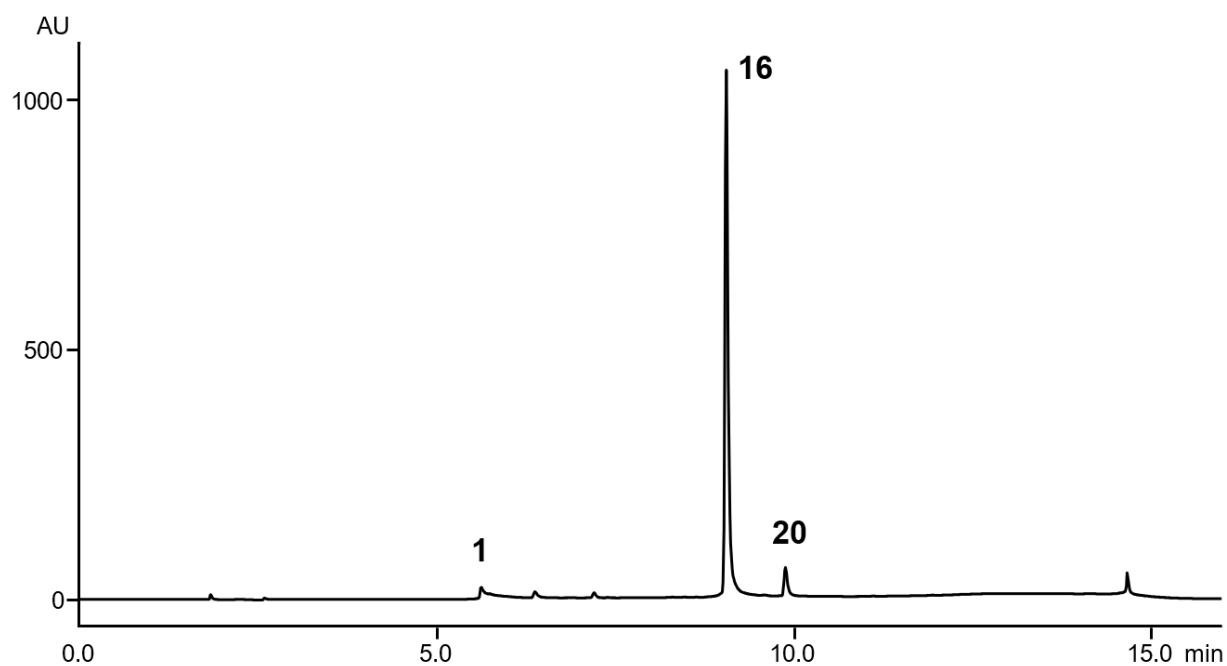

**Figure S7.** Typical HPLC profile of *Diadema setosum* total extract

HPLC conditions slightly differ from described in the manuscript: column Shim-pack XR-ODS (75 × 3 mm, 2,2 μm particle size, Shimadzu Europe GmbH), binary gradient of H<sub>2</sub>O (A): MeCN (B) with the addition of 0.2% AcOH at a flow rate of 0.3 ml/min and column temp. of 40 °C. The gradient was as follows: 0 – 10 min, 20 – 100% (B); 10 – 12 min, 100% (B), 12 – 14 min, 100 – 20% (B); and 14 – 16 min, 20% (B).

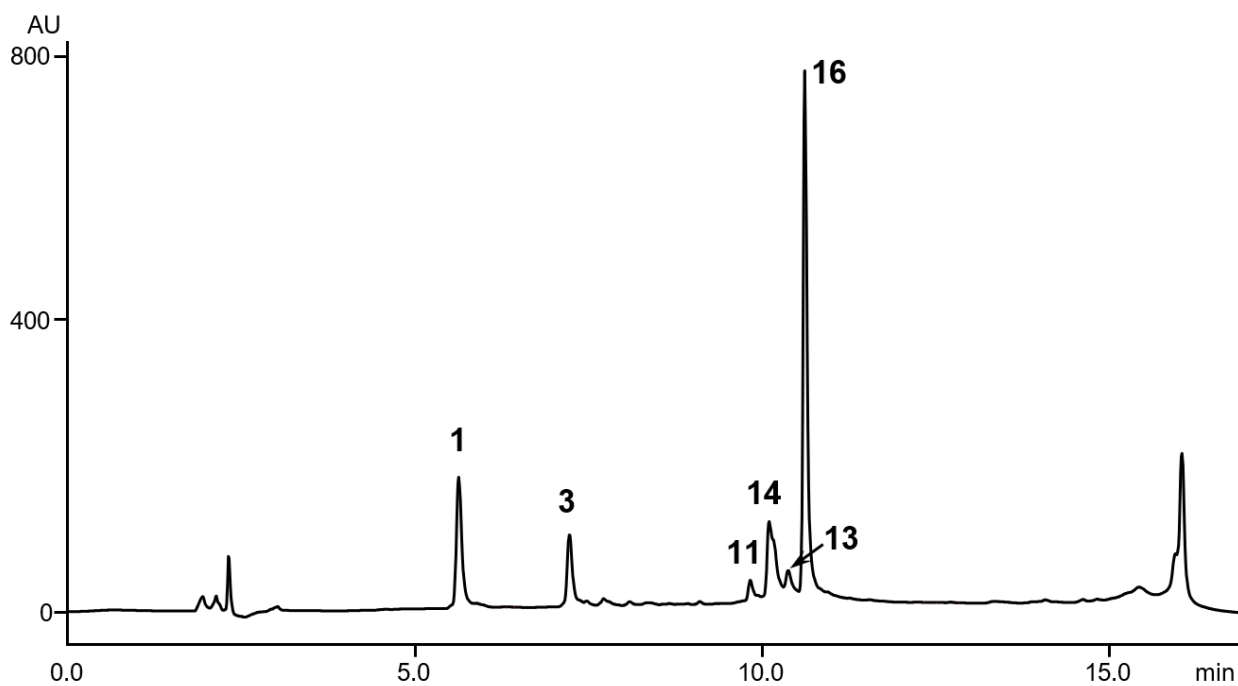

**Figure S8.** Typical HPLC profile of *Echinothrix calamaris* total extract

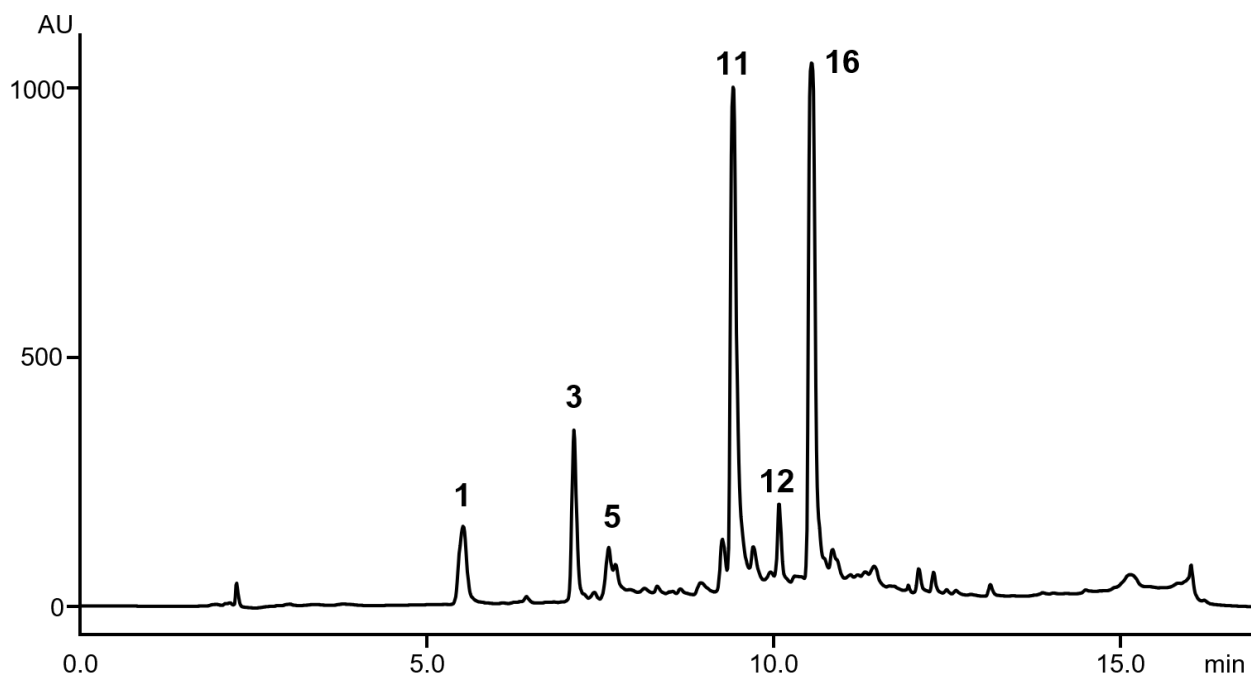

**Figure S9.** Typical HPLC profile of *Echinothrix diadema* total extract

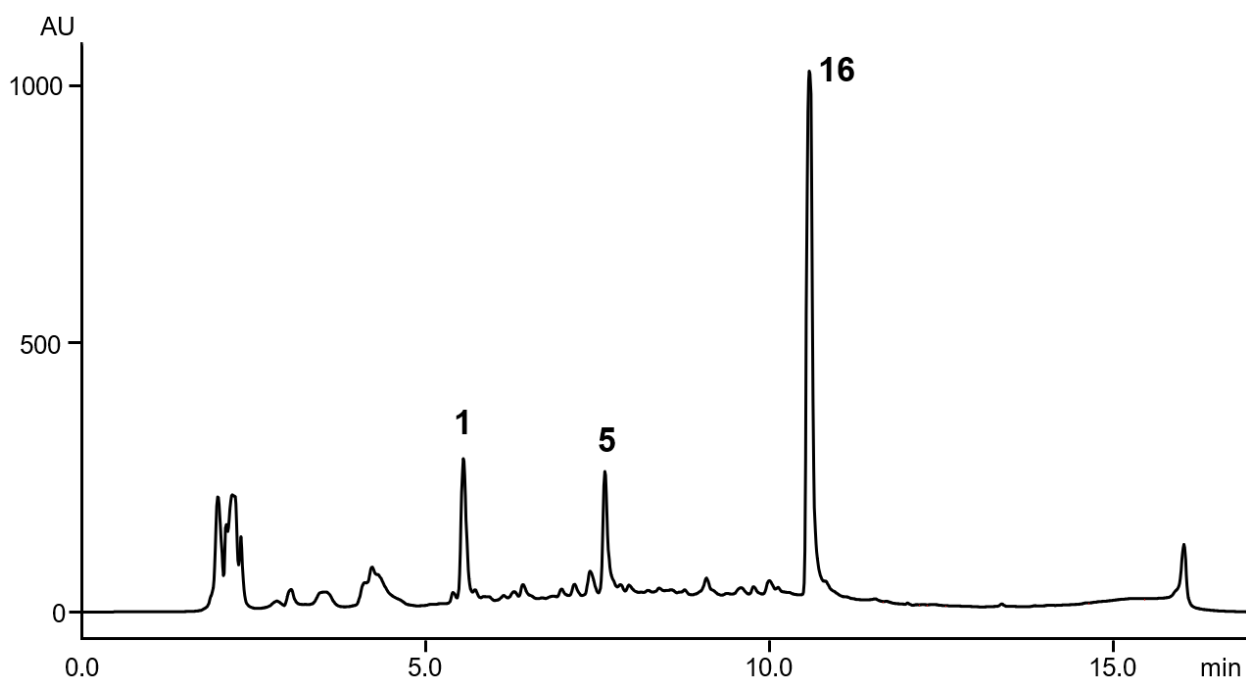

**Figure S10.** Typical HPLC profile of *Stomopneustes variolaris* total extract



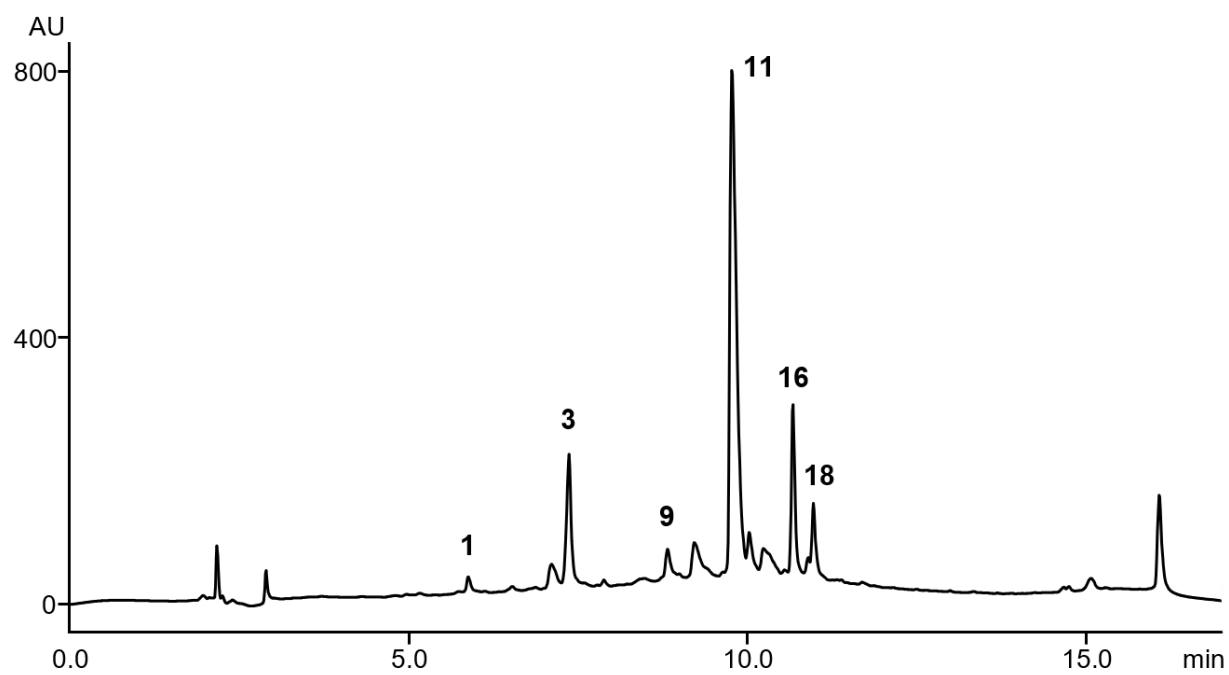

**Figure S11.** Typical HPLC profile of *Echinarachnius parma* total extract

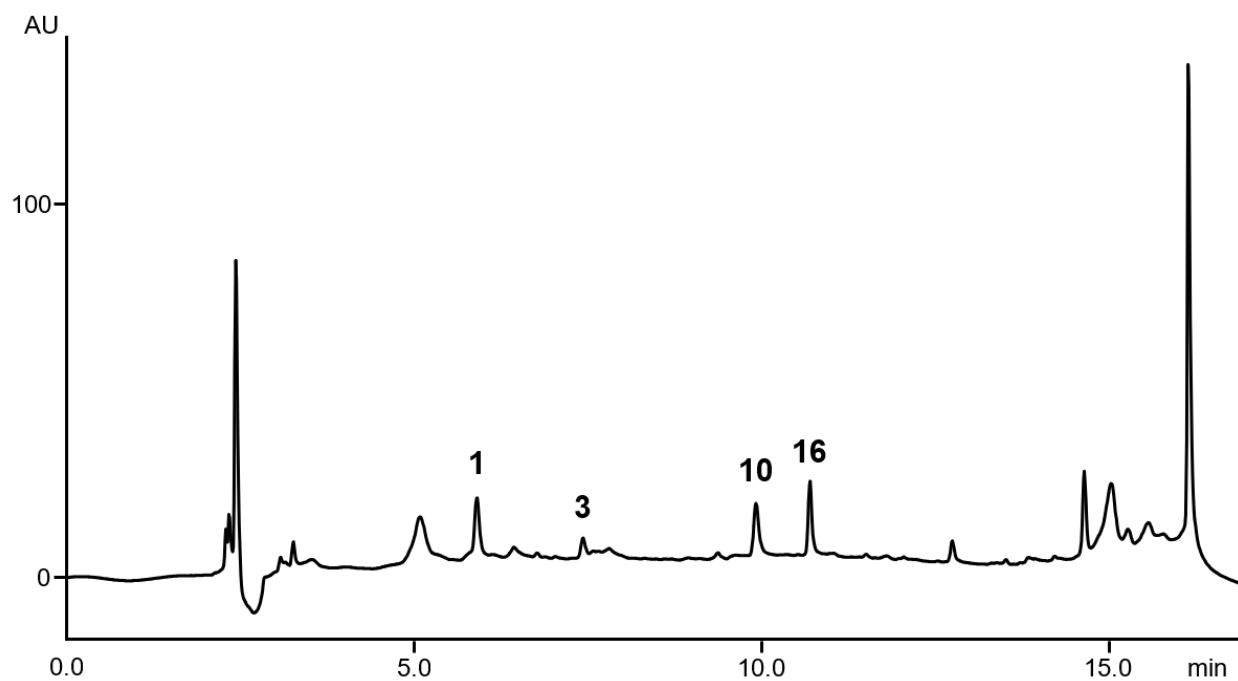

**Figure S12.** Typical HPLC profile of *L. decagonale* total extract

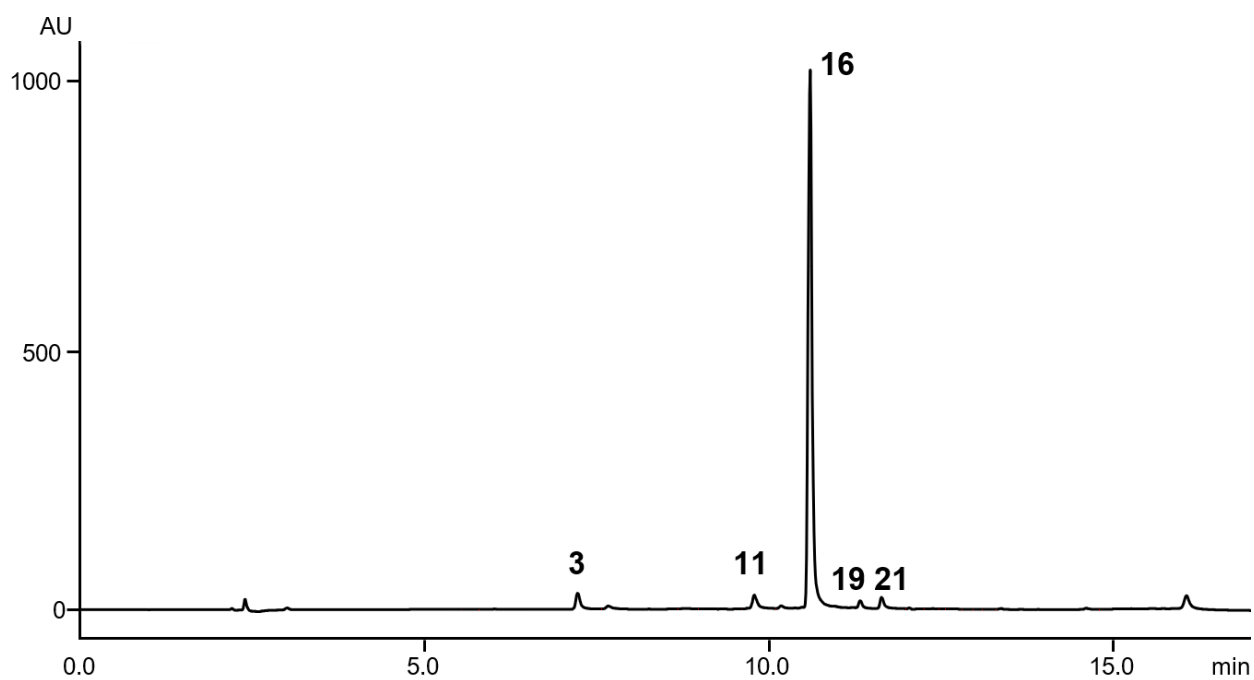

**Figure S13.** Typical HPLC profile of *Scaphechinus mirabilis* CHCl<sub>3</sub> extract

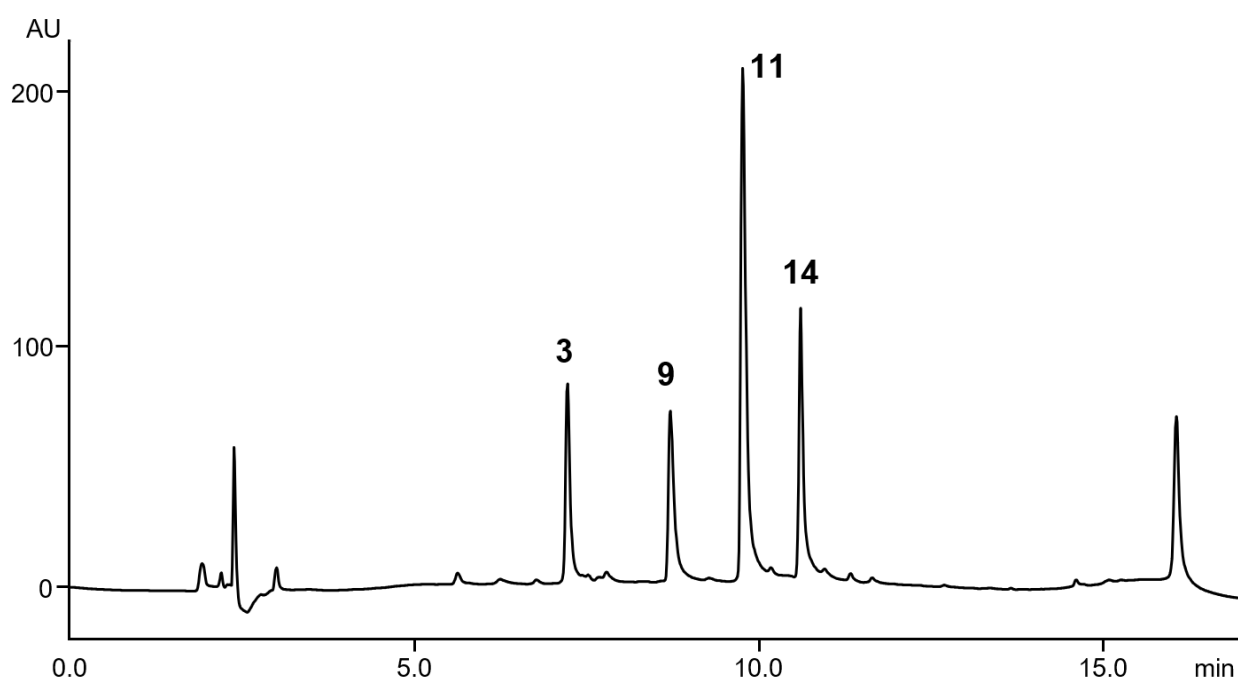

**Figure S14.** Typical HPLC profile of *Scaphechinus mirabilis* EtOAc extract

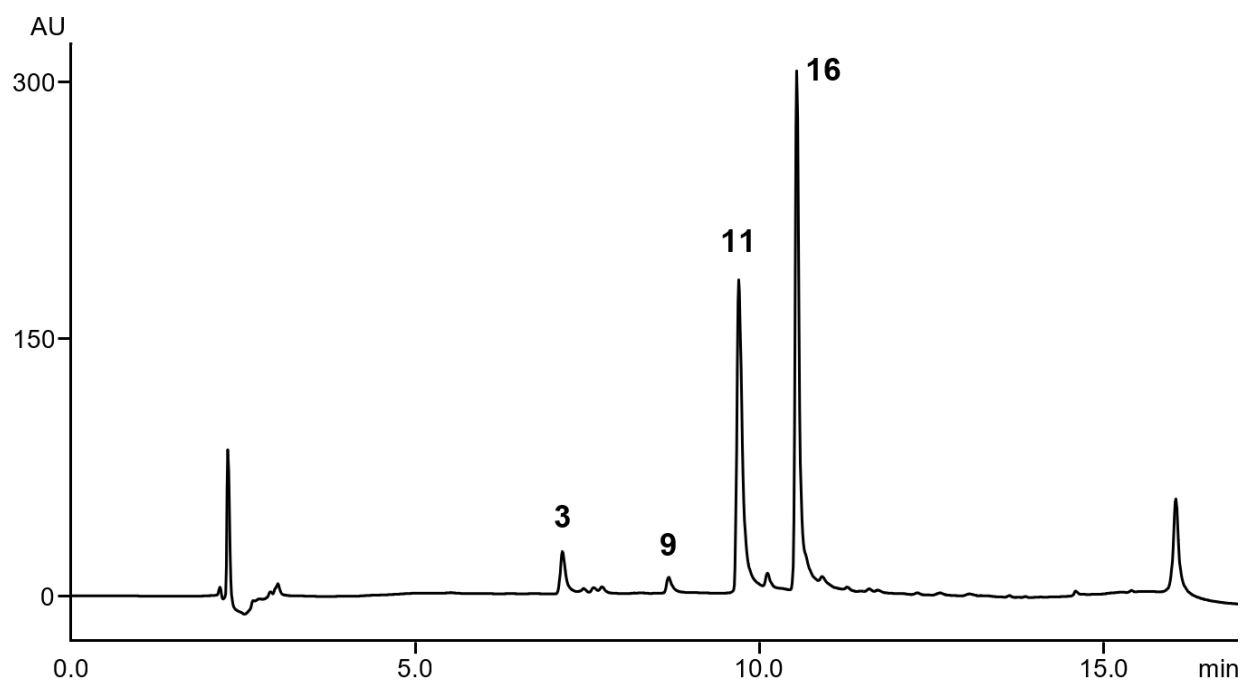

**Figure S15.** Typical HPLC profile of *Scaphechinus griseus* CHCl<sub>3</sub> extract

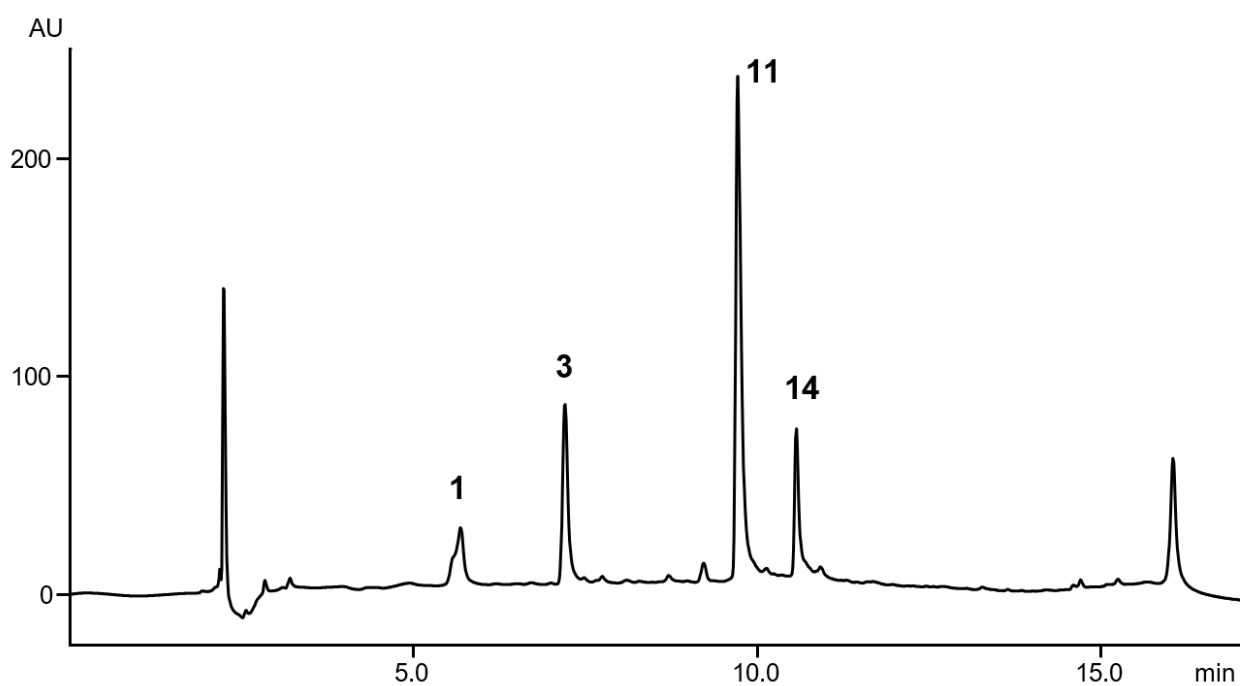

**Figure S16.** Typical HPLC profile of *Scaphechinus griseus* EtOAc extract

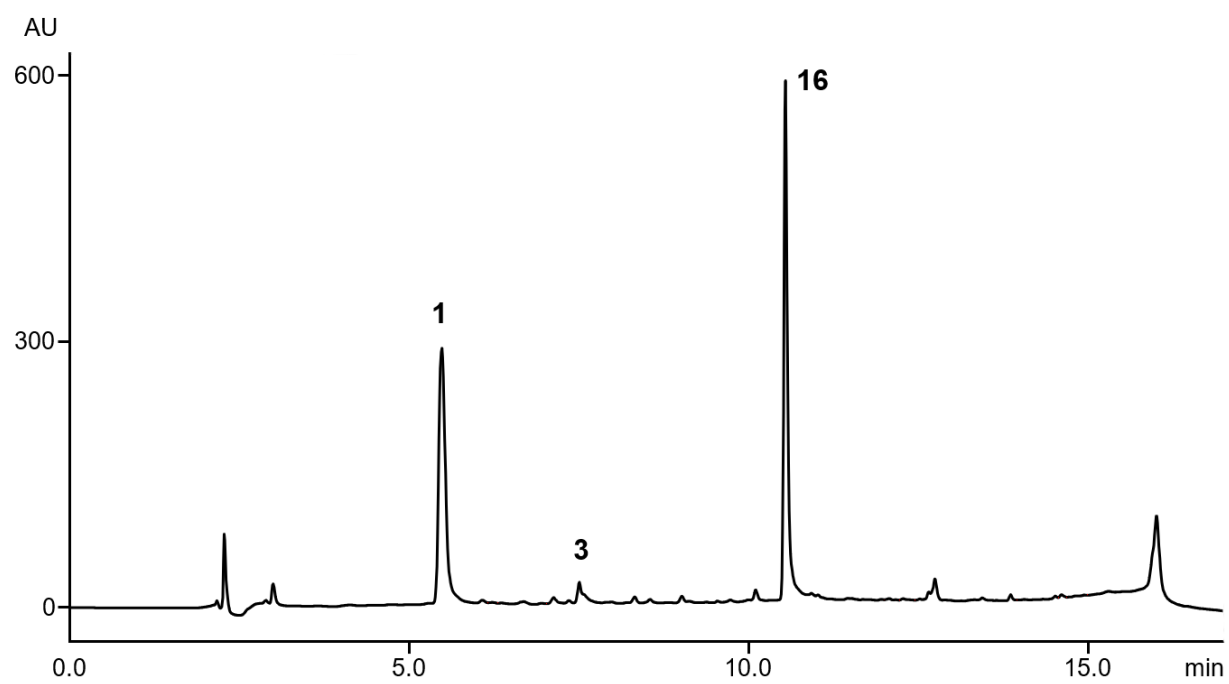

**Figure S17.** Typical HPLC profile of *Echinocardium cordatum* total extract

**Table S2.** Quinonoid pigments with established structure, found in various sea urchin species.

|    | <b>Pigment name</b>                                           | <b>Molecular formula</b>                        | <b>Calculated monoisotopic mass, Da</b> | <b>[M-H]<sup>-</sup></b> | <b>Absorption spectrum</b>          | <b>Structure elucidation reference</b> |
|----|---------------------------------------------------------------|-------------------------------------------------|-----------------------------------------|--------------------------|-------------------------------------|----------------------------------------|
| 1  | Echinochrome A                                                | C <sub>12</sub> H <sub>10</sub> O <sub>7</sub>  | 266.042664                              | 265                      | 254, 338, 471                       | [1]                                    |
| 2  | Spinochrome A                                                 | C <sub>12</sub> H <sub>8</sub> O <sub>7</sub>   | 264.027008                              | 263                      | 266, 312, 508                       | [2]                                    |
| 3  | Spinochrome B                                                 | C <sub>10</sub> H <sub>6</sub> O <sub>6</sub>   | 222.016434                              | 221                      | 265, 320, 390, 471                  | [2]                                    |
| 4  | Spinochrome C                                                 | C <sub>12</sub> H <sub>8</sub> O <sub>8</sub>   | 280.18700                               | 279                      | 290, 456                            | [3]                                    |
| 5  | Spinochrome D                                                 | C <sub>10</sub> H <sub>6</sub> O <sub>7</sub>   | 238.011353                              | 237                      | 251, 327, 463                       | [1]                                    |
| 6  | Spinochrome E                                                 | C <sub>10</sub> H <sub>6</sub> O <sub>8</sub>   | 254.006271                              | 253                      | 264, 350, 478                       | [4]                                    |
| 7  | Echinamine A                                                  | C <sub>12</sub> H <sub>11</sub> NO <sub>6</sub> | 265.0586                                | 264                      | 278, 352, 477                       | [5]                                    |
| 8  | Echinamine B                                                  | C <sub>12</sub> H <sub>11</sub> NO <sub>6</sub> | 265.0586                                | 264                      | 274, 352, 477                       | [5]                                    |
| 9  | Spinamine E                                                   | C <sub>10</sub> H <sub>7</sub> NO <sub>7</sub>  | 253.0150                                | 252                      | 275, 370, 473                       | [4]                                    |
| 10 | Ethylidene-3,3'-bis(2,6,7-trihydroxynaphthazarin)             | C <sub>22</sub> H <sub>14</sub> O <sub>14</sub> | 502.038361                              | 501                      | 254, 339, 471                       | [6]                                    |
| 11 | 7,7'-Anhydroethylidene-6,6'-bis(2,3,7-trihydroxynaphthazarin) | C <sub>22</sub> H <sub>12</sub> O <sub>13</sub> | 484.0203                                | 483                      | 265, 316, 470                       | [6]                                    |
| 12 | Mirabiquinone                                                 | C <sub>22</sub> H <sub>12</sub> O <sub>13</sub> | 484.0205                                | 483                      | 264, 325, 452                       | [7]                                    |
| 13 | 7-Ethyl-3,5,6,8-tetrahydroxy-2-methoxy-1,4-naphthoquinone     | C <sub>13</sub> H <sub>12</sub> O <sub>7</sub>  | 280.2302                                | 279                      | 252, 330, 491, 525                  | [6]                                    |
| 14 | 7-Ethyl-2,5,6,8-tetrahydroxy-3-methoxy-1,4-naphthoquinone     | C <sub>13</sub> H <sub>12</sub> O <sub>7</sub>  | 280.2302                                | 279                      | 256, 332, 474, 497, 538             | [6]                                    |
| 15 | Namakochrome                                                  | C <sub>11</sub> H <sub>8</sub> O <sub>8</sub>   | 268.176860                              | 267                      | 262, 340, 480, 524                  | [8]                                    |
| 16 | Mompain                                                       | C <sub>10</sub> H <sub>6</sub> O <sub>6</sub>   | 222.016434                              | 221                      | 270, 315, 515, 559                  | [9]                                    |
| 17 | 3-Acetyl-2-hydroxynaphthazarin                                | C <sub>12</sub> H <sub>8</sub> O <sub>6</sub>   | 248.032089                              | 247                      | 250(sh), 296, 490, 525(sh), 568(sh) | [9]                                    |
| 18 | Dehydroechinochrome                                           | C <sub>12</sub> H <sub>12</sub> O <sub>9</sub>  | 300.048135                              | 299                      | 256, 321, 391                       | [10]                                   |

**Table S3.** Quinonoid pigments with established structure that have been found at least once in sea urchins, but their nativeness has not been proven.

|    | <b>Pigment name</b>                                               | <b>Molecular formula</b>                       | <b>Calculated monoisotopic mass, Da</b> | <b>Absorption spectrum</b>                             | <b>Reference</b> |
|----|-------------------------------------------------------------------|------------------------------------------------|-----------------------------------------|--------------------------------------------------------|------------------|
| 1  | 6-ethyl-2-hydroxyjuglone                                          | C <sub>12</sub> H <sub>10</sub> O <sub>4</sub> | 218.057907                              | 237, 291, 418(sh), 432, 455(sh)                        | [9]              |
| 2  | 6-ethyl-2-hydroxynaphthazarin                                     | C <sub>12</sub> H <sub>10</sub> O <sub>5</sub> | 234.052826                              | 302, 479(sh), 505, 530, 544                            | [9]              |
| 3  | 3-ethyl-2,5-dihydroxybenzoquinone                                 | C <sub>8</sub> H <sub>8</sub> O <sub>4</sub>   | 168.04226                               | 287                                                    | [9]              |
| 4  | Naphthopurpurin                                                   | C <sub>10</sub> H <sub>6</sub> O <sub>5</sub>  | 206.021530                              | 290, 390(sh), 475, 488, 498(sh), 519(sh), 534(sh)      | [9]              |
| 5  | 6-acetyl-2,7-dihydroxyjuglone                                     | C <sub>12</sub> H <sub>8</sub> O <sub>6</sub>  | 248.032089                              | 241, 307, 374, 469                                     | [9]              |
| 6  | 6-acetyl-2-hydroxynaphthazarin                                    | C <sub>12</sub> H <sub>8</sub> O <sub>6</sub>  | 248.032089                              | 236, 297, 507                                          | [9]              |
| 7  | 3-ethyl-2,7-dihydroxynaphthazarin (ethylmompain)                  | C <sub>12</sub> H <sub>10</sub> O <sub>6</sub> | 250.047745                              | 237, 265, 321, 420(sh), 450(sh), 489(sh), 513, 549(sh) | [9], [11]        |
| 8  | 6-acetyl-2,3,7-trihydroxyjuglone                                  | C <sub>12</sub> H <sub>8</sub> O <sub>7</sub>  | 264.027008                              | 305, 388, 490                                          | [9]              |
| 9  | 6-ethyl-2,3,7-trihydroxyjuglone                                   | C <sub>12</sub> H <sub>10</sub> O <sub>6</sub> | 250.047745                              | 270, 330, 417, 485(sh)                                 | [9]              |
| 10 | 2-hydroxy-2'-methyl-2'H-pyrano[2,3-b]naphthazarin                 | C <sub>14</sub> H <sub>10</sub> O <sub>6</sub> | 274.229                                 | 292, 340, 488, 564(sh)                                 | [12]             |
| 11 | 3-ethyl-2,5,7,8-tetrahydroxy-1,4-naphthoquinone (ethylisomompain) | C <sub>12</sub> H <sub>10</sub> O <sub>6</sub> | 250.047745                              | 233, 319, 423, 492, 527                                | [13]             |
| 12 | 2,3,5,8-tetrahydroxy-1,4-naphthoquinone (spinazarin)              | C <sub>10</sub> H <sub>6</sub> O <sub>6</sub>  | 222.016434                              | 230, 246, 302(sh), 460, 489, 525(sh)                   | [11]             |
| 13 | 6-ethyl-2,3,5,8-tetrahydroxy-1,4-naphthoquinone (ethylspinazarin) | C <sub>12</sub> H <sub>10</sub> O <sub>6</sub> | 250.047745                              | 204, 253, 292, 460, 485, 510(sh), 522(sh)              | [11]             |
| 14 | 3-acetyl-2,7-dihydroxy-6-methyl-1,4-naphthoquinone                | C <sub>13</sub> H <sub>10</sub> O <sub>7</sub> | 278.042664                              | 261, 324, 506(sh), 535, 568(sh)                        | [14]             |

**Table S4.** Quinonoid pigments found in sea urchins, that have no established structure.

|    | <b>Pigment name</b>                                                                                       | <b>Measured [M – H]<sup>-</sup></b> | <b>Molecular formula</b>                         | <b>Absorption spectrum</b> | <b>Detection method</b> | <b>Reference</b> |
|----|-----------------------------------------------------------------------------------------------------------|-------------------------------------|--------------------------------------------------|----------------------------|-------------------------|------------------|
| 1  | Acetylaminotrihydroxynaphthoquinone                                                                       | 262.0352                            | C <sub>12</sub> H <sub>9</sub> NO <sub>6</sub>   | 245, 323, 484              | UPLC-Q-TOFMS            | [15]             |
| 2  | Aminopentahydroxynaphthoquinone<br>(Structure established by Vasileva et al. 2016, was named spinamine E) | 252.0164                            | C <sub>10</sub> H <sub>7</sub> NO <sub>7</sub>   | 272, 370, 484              | UPLC-Q-TOFMS            | [15]             |
| 3  | Spinochrome dimer MW 536                                                                                  | 535.0359                            | C <sub>22</sub> H <sub>16</sub> O <sub>16</sub>  | 340, 400, 480              | HPLC-DAD-MS             | [16], [17]       |
| 4  | Spinochrome dimer MW 484<br>(Authors named as anhydroethylidene-6,6'-bis(2,3,7-trihydroxynaphthazarin) 2) | 483.0202                            | No data                                          | No data                    | HPLC-DAD-MS             | [16]             |
| 5  | Spinochrome E sulphate derivative                                                                         | 332.9553                            | C <sub>10</sub> H <sub>5</sub> O <sub>11</sub> S | 260, 330, 475              | HPLC-DAD-MS             | [18]             |
|    | Spinochrome E sulphate derivative iso1                                                                    | 332.9563                            |                                                  | 235, 324, 502              | UHPLC-DAD-MS/MS         | [17]             |
|    | Spinochrome E sulphate derivative iso2                                                                    | 332.9559                            |                                                  | No data                    | UHPLC-DAD-MS/MS         | [17]             |
| 6  | No data                                                                                                   | 255.0144                            | C <sub>10</sub> H <sub>7</sub> O <sub>8</sub>    | 246, 295, 348              | HPLC-DAD-MS             | [18]             |
| 7  | Spinochrome B sulphate derivative                                                                         | 300.9657                            | C <sub>10</sub> H <sub>5</sub> O <sub>9</sub> S  | 262, 300, 420              | HPLC-DAD-MS             | [18]             |
| 8  | No data                                                                                                   | 297.0249                            | C <sub>12</sub> H <sub>9</sub> O <sub>9</sub>    | 220, 250, 279, 365         | HPLC-DAD-MS             | [18]             |
| 9  | Spinochrome D sulphate derivative                                                                         | 316.9617                            | No data                                          | 231, 320, 508              | UHPLC-DAD-MS/MS         | [17]             |
| 10 | Spinochrome dimer MW 536 sulphate derivative                                                              | 614.9926                            | No data                                          | 257, 324, 397, 504         | UHPLC-DAD-MS/MS         | [17]             |
| 11 | Spinochrome C sulphate derivative                                                                         | 358.9721                            | No data                                          | 225, 258, 313, 505         | UHPLC-DAD-MS/MS         | [17]             |
| 12 | Spinochrome dimer MW 502 sulphate derivative                                                              | 580.9871                            | No data                                          | 238, 327, 506              | UHPLC-DAD-MS/MS         | [17]             |

**Table S5.** Compounds found in sea urchins without proof of their quinonoid nature.

|   | <b>Pigment name</b>                                                                      | <b>Measured<br/>[M – H]<sup>-</sup></b> | <b>Calculated<br/>[M – H]<sup>-</sup></b> | <b>Molecular<br/>formula</b>                    | <b>Absorption<br/>spectrum</b> | <b>Detection method</b> | <b>Reference</b> |
|---|------------------------------------------------------------------------------------------|-----------------------------------------|-------------------------------------------|-------------------------------------------------|--------------------------------|-------------------------|------------------|
| 1 | Spinochrome D— Iso 2                                                                     | 237.04                                  | 237.0035                                  | C <sub>10</sub> H <sub>6</sub> O <sub>7</sub>   | No data                        | HPLC-MS                 | [20]             |
| 2 | Spinochrome D— Iso 3                                                                     | 237.04                                  | 237.0035                                  | C <sub>10</sub> H <sub>6</sub> O <sub>7</sub>   | No data                        | HPLC-MS                 | [19], [20]       |
| 3 | Spinochrome 252                                                                          | 251.02                                  |                                           | C <sub>11</sub> H <sub>8</sub> O <sub>7</sub>   | No data                        | HPLC-MS                 | [20]             |
| 4 | Echinamine 253<br>Most likely it is spinamine E (Vasileva et al. 2016)                   | 252.16                                  |                                           | C <sub>10</sub> H <sub>7</sub> O <sub>7</sub> N | No data                        | HPLC-MS                 | [20]             |
| 5 | Spinochrome A— Iso 2                                                                     | 263.01                                  | 263.01918                                 | C <sub>12</sub> H <sub>8</sub> O <sub>7</sub>   | No data                        | HPLC-MS                 | [19], [20]       |
| 6 | Spinochrome 282<br>Most likely it is spinochrome E dimethyl ether (Vasileva et al. 2017) | 281.03                                  | 281.02975                                 | C <sub>12</sub> H <sub>9</sub> O <sub>8</sub>   | No data                        | HPLC-MS                 | [20]             |
| 7 | Spinochrome B— Iso 1                                                                     | No data                                 |                                           | C <sub>10</sub> H <sub>6</sub> O <sub>6</sub>   | No data                        | HPLC-MS                 | [21]             |
| 8 | Spinochrome B— Iso 2                                                                     | No data                                 |                                           | C <sub>10</sub> H <sub>6</sub> O <sub>6</sub>   | No data                        | HPLC-MS                 | [21]             |
| 9 | Spinochrome B— Iso 3                                                                     | No data                                 |                                           | C <sub>10</sub> H <sub>6</sub> O <sub>6</sub>   | No data                        | HPLC-MS                 | [21]             |



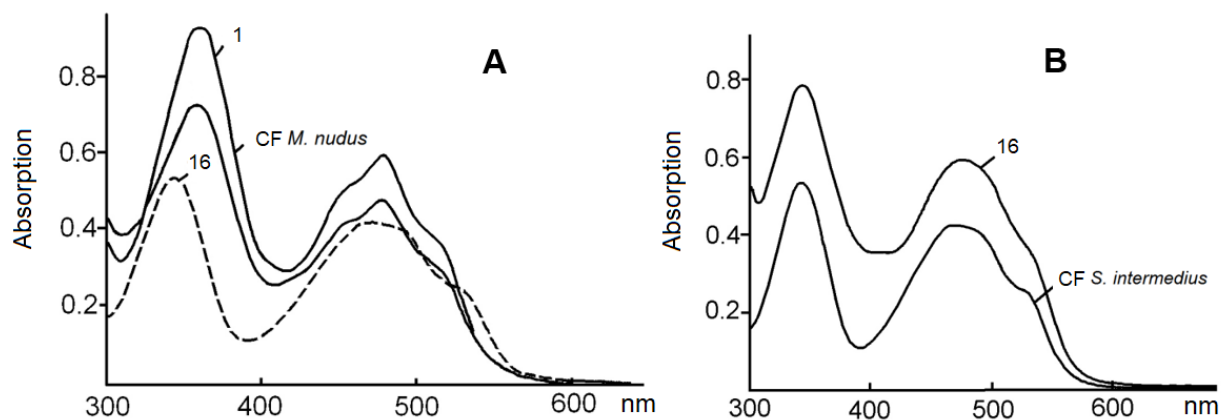

**Figure S18.** Absorption spectra (ethanol): **A)** echinochrome A (**16**) and spinochrome E (**1**) in comparison with the spectrum of the *M. nudus* coelomic fluid (CF) extract; **B)** echinochrome A (**16**) in comparison with the spectrum of *S. intermedius* CF.

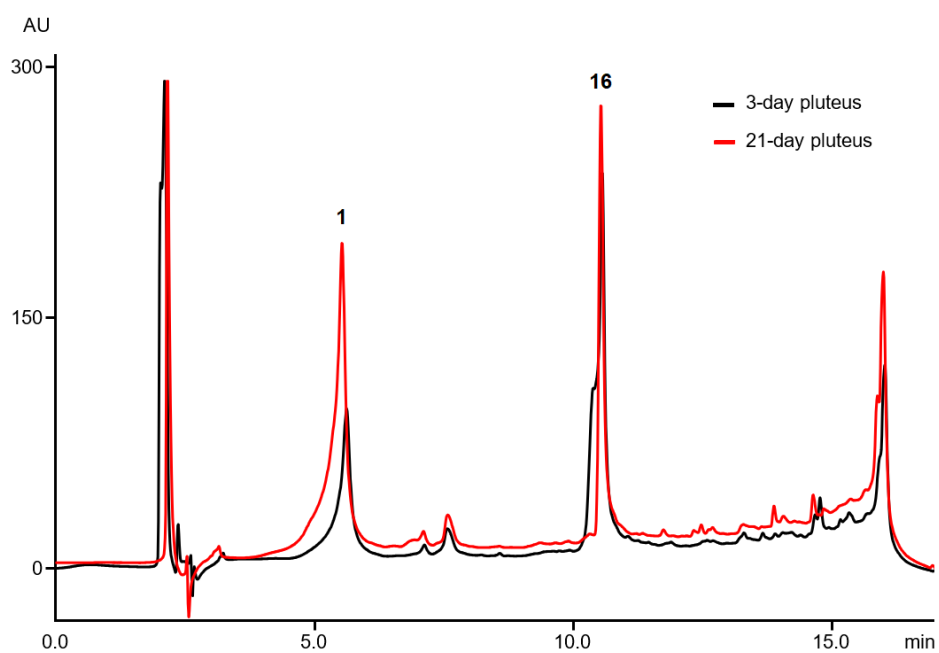

**Figure S19.** HPLC profile of *Scaphechinus mirabilis* 3-day and 21-day pluteus.

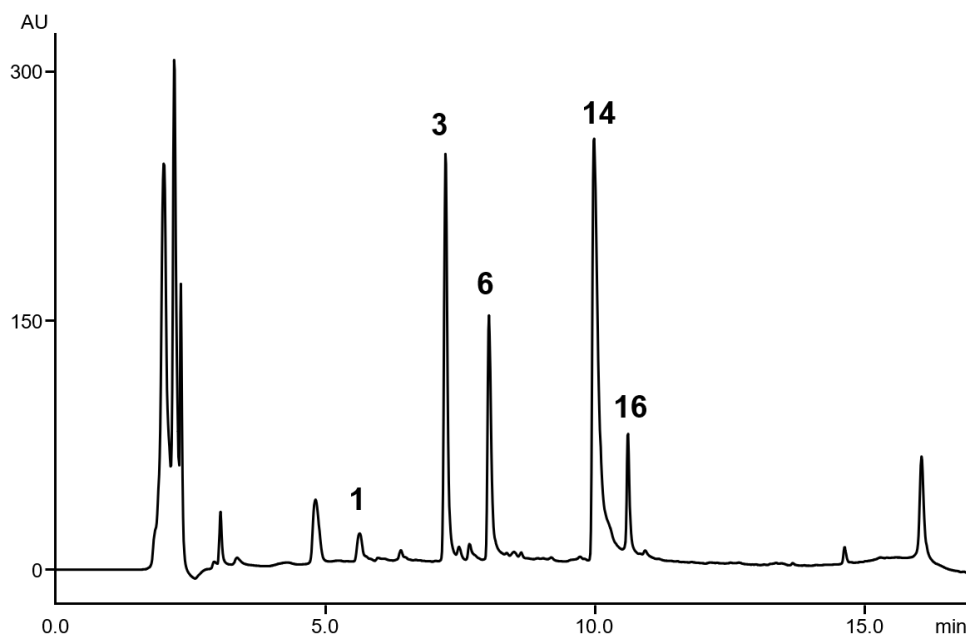

**Figure S20.** HPLC profile of *Echinarachnius parma* jelly-like egg membrane pigment granules

#### ***Total Quinonoid Pigments Content***

The content of quinonoid pigments in sea urchin shells was determined spectrophotometrically on a UV-mini 1240 (Shimadzu Corp., Kyoto, Japan) and expressed as  $\mu\text{g}$  of echinochrome A equivalent per g of dry shells as described earlier. A solution of the echinochrome A standard sample was prepared at a concentration of 1.0 mg/ml in methanol. The calibration curve was prepared at five different concentration levels: 10 – 50  $\mu\text{g}/\text{ml}$ ,  $y = 27.988x - 0.0218$ ,  $R^2 = 0.9996$ . The  $\text{CHCl}_3$  and EtOAc sea urchin extracts were dissolved in methanol (20 mg/ml) and filtered through a 0.45  $\mu\text{m}$  nylon syringe filter; 10 – 50  $\mu\text{l}$  of the prepared solution was added to 2.5 ml of ethanol, and the absorption of each dilution at 468 nm was measured. The content of quinonoid pigments was calculated from the echinochrome A calibration curve and expressed as  $\mu\text{g}$  of echinochrome A equivalent per g of dry shells.

## References

1. Vasileva, E.A.; Mishchenko, N.P.; Tran, V.T.T.; Vo, H.M.N.; Bui, L.M.; Denisenko, V.A.; Fedoreyev, S.A. Quinoid pigments from the sea urchin *Astropyga radiata*. *Chem. Nat. Compd.* **2017**, *53*, 356–358.
2. Thomson, R.H. *Naturally Occurring Quinones*, 2nd ed.; Academic Press: London, United Kingdom, 1971; 734 p.
3. Pokhilo, N.D.; Anufriev, V.F. Simple synthesis of spinochrome C, a sea urchin pigment. *Chem. Nat. Compd.* **2016**, *52*, 939–940.
4. Vasileva, E.A.; Mishchenko, N.P.; Zadorozhny, P.A.; Fedoreyev, S.A. New Aminonaphthoquinone from the Sea Urchins *Strongylocentrotus pallidus* and *Mesocentrotus nudus*. *Nat. Prod. Commun.* **2016**, *11*, 821–824.
5. Mischenko, N.P.; Fedoreyev, S.A.; Pokhilo, N.D.; Anufriev, V.P.; Denisenko, V.A.; Glazunov, V.P. Echinamines A and B, first aminated hydroxynaphthazarins from the sea urchin *Scaphechinus mirabilis*. *J. Nat. Prod.* **2005**, *68*, 1390–1393.
6. Vasileva, E.A.; Mishchenko, N.P.; Fedoreyev, S.A. Diversity of polyhydroxynaphthoquinone pigments in North Pacific sea urchins. *Chem.&Biodivers.* **2017**, *14*, e1700182[1–9].
7. Mishchenko, N.P.; Vasileva, E.A.; Fedoreyev, S.A. Mirabiquinone, a new unsymmetrical binaphthoquinone from the sea urchin *Scaphechinus mirabilis*. *Tetrahedron Lett.* **2014**, *55*, 5967–5969.
8. Singh, H.; Moore, R.E.; Scheuer, P.J. The distribution of quinone pigments in echinoderms. *Experientia* **1967**, *23*, 624–626.
9. Moore, R.E.; Singh, H.; Scheuer, P.J. Isolation of eleven new spinochromes from echinoids of the genus *Echinothrix*. *J. Org. Chem.* **1966**, *31*, 3645–3650.
10. Novikov, V.L.; Shestak, O.P.; Mishchenko, N.P.; Fedoreyev, S.A.; Vasileva, E.A.; Glazunov, V.P.; Artyukov, A.A. Oxidation of 7-ethyl-2,3,5,6,8-pentahydroxy-1,4-naphthoquinone (echinochrome A) by atmospheric oxygen 1. Structure of dehydroechinochrome. *Russ. Chem. Bull.* **2018**, *67*, 282–290.
11. Yakubovskaya, A.Y.; Pokhilo, N.D.; Mishchenko, N.P.; Anufriev, V.F. Spinazarin and ethylspinazarin, pigments of the sea urchin *Scaphechinus mirabilis*. *Russ. Chem. Bull.* **2007**, *56*, 819–822.
12. Moore, R.E.; Singh, H.; Scheuer, P.J. A pyranonaphthazarin pigment from the sea urchin *Echinothrix diadema*. *Tetrahedron Lett.* **1968**, *9*, 4581–4583.
13. Mishchenko, N.P.; Fedoreyev, S.A.; Glazunov, V.P.; Denisenko, V.A.; Krasovskaya, N.P.; Glebko, L.I.; Maslov, L.G.; Dmitrenok, P.S.; Bagirova, V.L. Isolation and identification of impurities in the parent substance of echinochrome and in the drug histochrome. *Pharm. Chem. J.* **2004**, *38*, 50–53.
14. Kol'tsova, E.A.; Chumak, G.N.; Maksimov, O.B. Quinoid pigments of echinodermata III. Minor pigments of the sea urchin *Strongylocentrotus nudus*. *Chem. Nat. Compd.* **1977**, *13*, 174–177.
15. Zhou, D.Y.; Qin, L.; Zhu, B.W.; Wang, X.D.; Tan, H.; Yang, J.F.; Li, D.M.; Dong, X.P.; Wu, H.T.; Sun, L.M.; Li, X.L. Extraction and antioxidant property of polyhydroxylated naphthoquinone pigments from spines of purple sea urchin *Strongylocentrotus nudus*. *Food Chem.* **2011**, *129*, 1591–1597.
16. Shikov, A.N.; Ossipov, V.I.; Martiskainen, O.; Pozharitskaya, O.N.; Ivanova, S.A.; Makarov, V.G. The offline combination of thin-layer chromatography and high-performance liquid chromatography with diode array detection and micrOTOF-Q mass spectrometry for the separation and identification of spinochromes from sea urchin (*Strongylocentrotus droebachiensis*) shells. *J. Chromatogr. A* **2011**, *1218*, 9111–9114.
17. Hira, J.; Wolfson, D.; Andersen, A.J.C.; Haug, T.; Stensvåg, K. Autofluorescence mediated red spherulocyte sorting provides insights into the source of spinochromes in sea urchins. *Sci. Rep.* **2020**, *10*, 1–9.
18. Powell, C.; Hughes, A.D.; Kelly, M.S.; Conner, S.; McDougall, G.J. Extraction and identification of antioxidant polyhydroxynaphthoquinone pigments from the sea urchin *Psammechinus miliaris*. *LWT - Food Sci. Technol.* **2014**, *59*, 455–460.
19. Brasseur, L.; Hennebert, E.; Fievez, L.; Caulier, G.; Bureau, F.; Tafforeau, L.; Flammang, P.; Gerbaux, P.; Eeckhaut, I. The roles of spinochromes in four shallow water tropical sea urchins and their potential as bioactive pharmacological agents. *Mar. Drugs* **2017**, *15*, E179 [1–18].
20. Brasseur, L.; Demeyer, M.; Decroo, C.; Caulier, G.; Flammang, P.; Gerbaux, P.; Eeckhaut, I. Identification and quantification of spinochromes in body compartments of *Echinometra mathaei*'s coloured types. *R. Soc. Open Sci.* **2018**, *5*, 171213 [1–15].
21. Brasseur, L.; Caulier, G.; Lepoint, G.; Gerbaux, P.; Eeckhaut, I. *Echinometra mathaei* and its ectocommensal shrimps: the role of sea urchin spinochrome pigments in the symbiotic association. *Sci. Rep.* **2018**, *8*, 1–10.
